# Supplementary material
Source: PubMed Central journal article supplement (PMC5801040)
Supplement: NIHMS867394-supplement-5.pdf [file NIHMS867394-supplement-5.pdf]

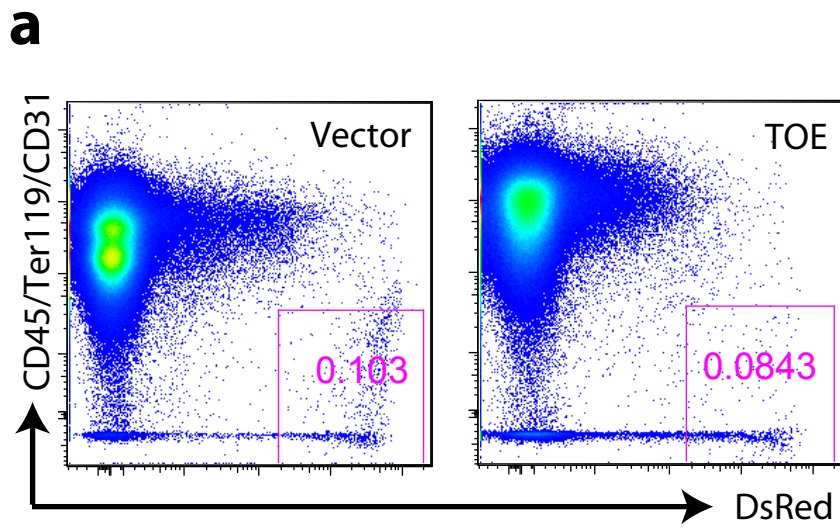

**b**

| Genes  | CON       | TOE       |
|--------|-----------|-----------|
| Pdgfra | 1373±988  | 2619±1113 |
| Pdgfrb | 1405±624  | 1886±759  |
| Lepr   | 3599±769  | 2208±238  |
| Nestin | 35±3      | 36±1      |
| Ng2    | 90±23     | 67±9      |
| Cxcl12 | 7341±572  | 6186±898  |
| Scf    | 3589±1454 | 2828±453  |

**c** Mouse fibrosis genes

|         |           |          |
|---------|-----------|----------|
| Acta2   | Il5       | Serpine1 |
| Agt     | Ilk       | Serpinh1 |
| Akt1    | Inhbe     | Smad2    |
| Bcl2    | Itga1     | Smad3    |
| Bmp7    | Itga2     | Smad4    |
| Cav1    | Itga3     | Smad6    |
| Ccl11   | Itgav     | Smad7    |
| Ccl12   | Itgb1     | Snai1    |
| Ccl3    | Itgb3     | Sp1      |
| Ccr2    | Itgb5     | Stat1    |
| Cebpb   | Itgb6     | Stat6    |
| Col1a2  | Itgb8     | Tgfb1    |
| Col3a1  | Jun       | Tgfb2    |
| Ctgf    | Lox       | Tgfb3    |
| Cxcr4   | Ltbp1     | Tgfbr1   |
| Dcn     | Mmp13     | Tgfbr2   |
| Edn1    | Mmp14     | Tgif1    |
| Egf     | Mmp1a     | Thbs1    |
| Eng     | Mmp2      | Thbs2    |
| Fasl    | Mmp3      | Timp1    |
| Grem1   | Mmp8      | Timp2    |
| Gusb    | Mmp9      | Timp3    |
| Hgf     | Myc       | Timp4    |
| Ifng    | Nfkb1     | Tnf      |
| Il10    | Pdgfa     | Vegfa    |
| Il13    | Pdgfb     |          |
| Il13ra2 | Plat      |          |
| Il1a    | Plau      |          |
| Il1b    | Plg       |          |
| Il4     | Serpina1a |          |

**d** Mouse osteogenesis genes

|         |        |          |
|---------|--------|----------|
| Acvr1   | Ctsk   | Serpinh1 |
| Ahsg    | Dlx5   | Smad1    |
| Alpl    | Egf    | Smad2    |
| Anxa5   | Fgf1   | Smad3    |
| Bglap   | Fgf2   | Smad4    |
| Bgn     | Fgfr1  | Smad5    |
| Bmp1    | Fgfr2  | Sost     |
| Bmp2    | Flt1   | Sox9     |
| Bmp3    | Fn1    | Sp7      |
| Bmp4    | Gdf10  | Spp1     |
| Bmp5    | Gli1   | Tgfb1    |
| Bmp6    | Icam1  | Tgfb2    |
| Bmp7    | Igf1   | Tgfb3    |
| Bmpr1a  | Igf1r  | Tgfbr1   |
| Bmpr1b  | Ihh    | Tgfbr2   |
| Bmpr2   | Itga2  | Tgfbr3   |
| Cd36    | Itga2b | Tnf      |
| Cdh11   | Itga3  | Tnfsf11  |
| Chrd    | Itgam  | Twist1   |
| Col10a1 | Itgav  | Vacm1    |
| Col14a1 | Itgb1  | Vegfa    |
| Col1a1  | Mmp10  | Vegfb    |
| Col2a1  | Mmp2   |          |
| Col3a1  | Mmp8   |          |
| Col4a1  | Mmp9   |          |
| Col5a1  | Nfkb1  |          |
| Comp    | Nog    |          |
| Csf1    | Pdgfa  |          |
| Csf2    | Phex   |          |
| Csf3    | Runx2  |          |

Figure S4
