# Supplementary material
Source: PubMed Central journal article supplement (PMC5801040)

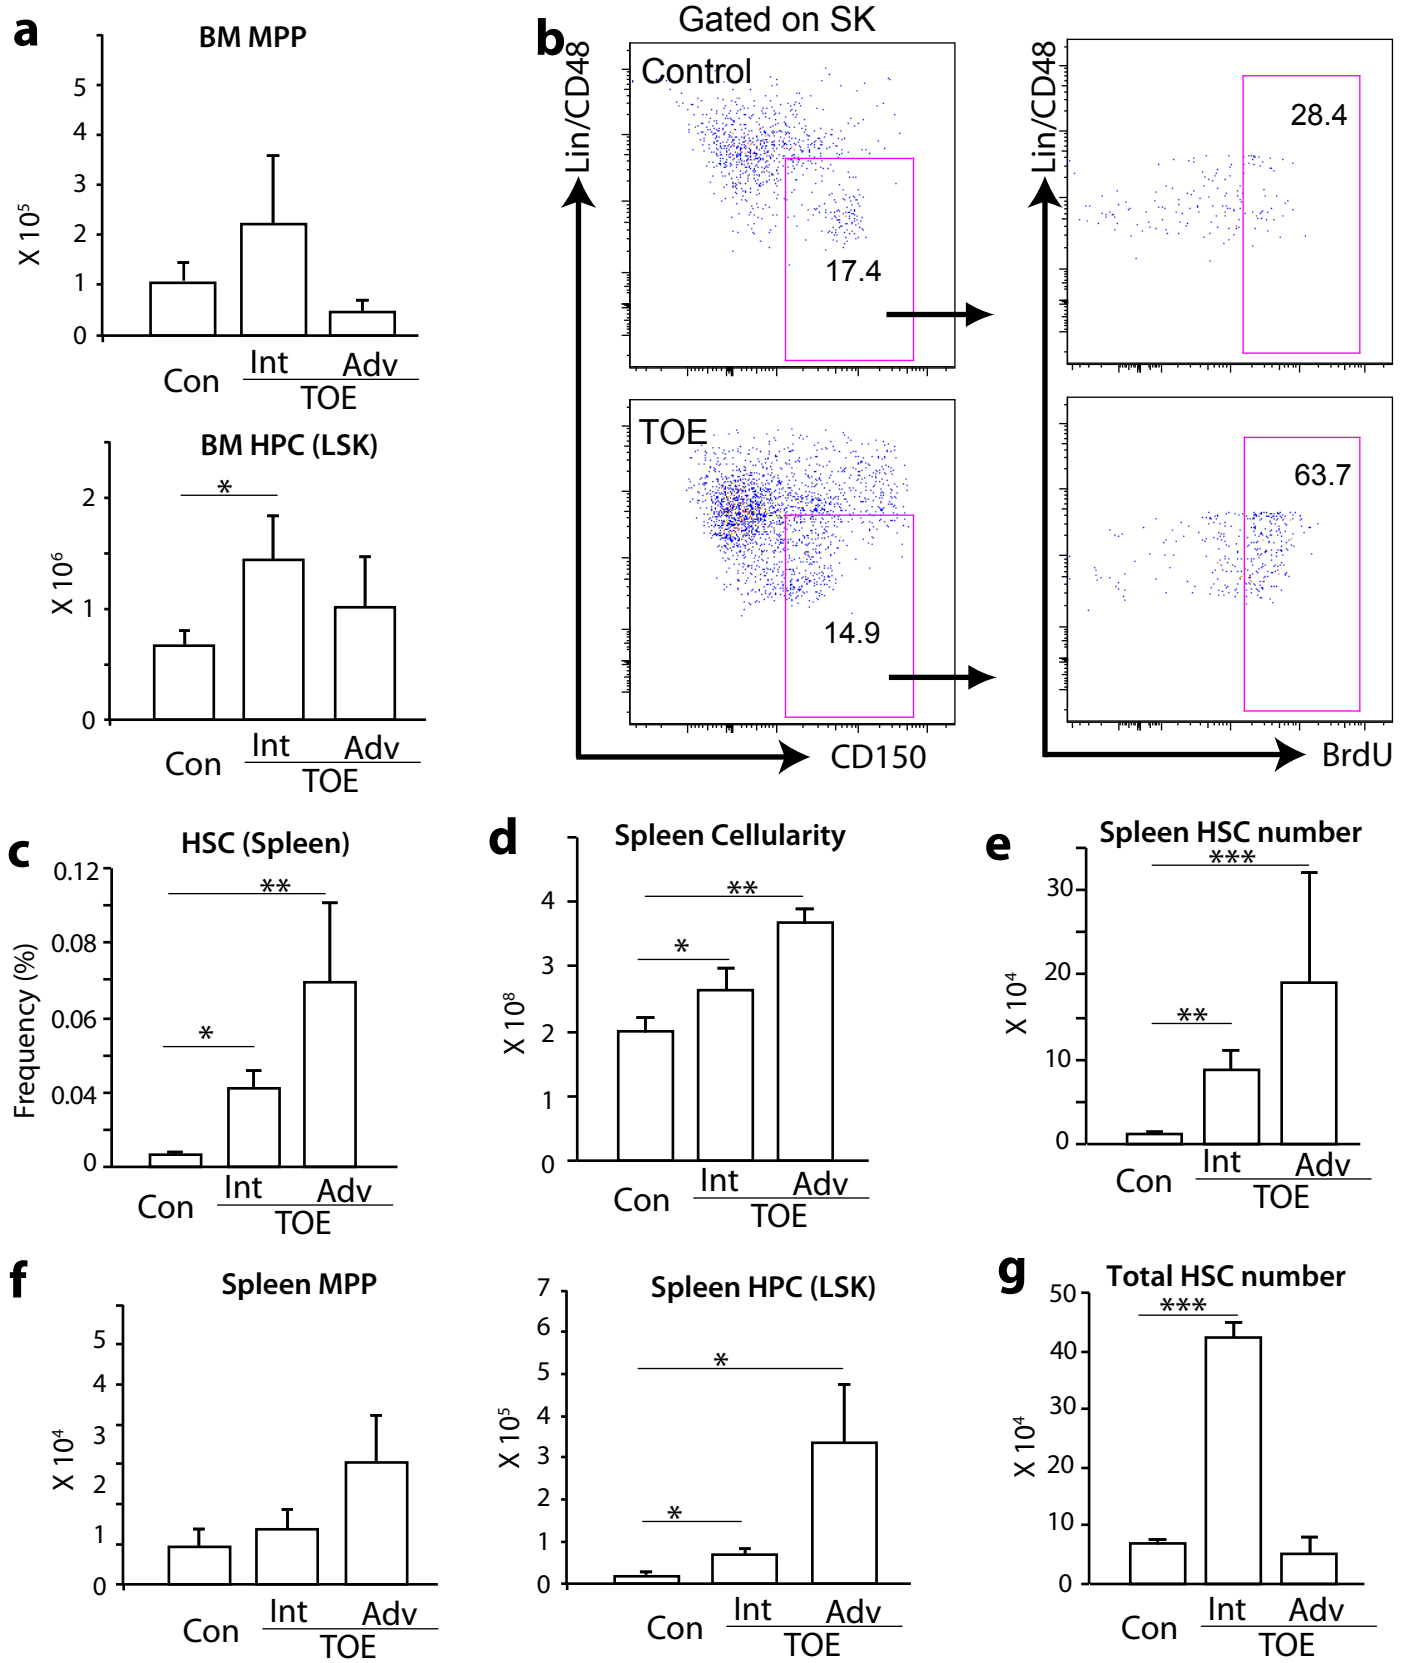

Figure S1

Supplement: NIHMS867394-supplement-2.pdf [file NIHMS867394-supplement-2.pdf]

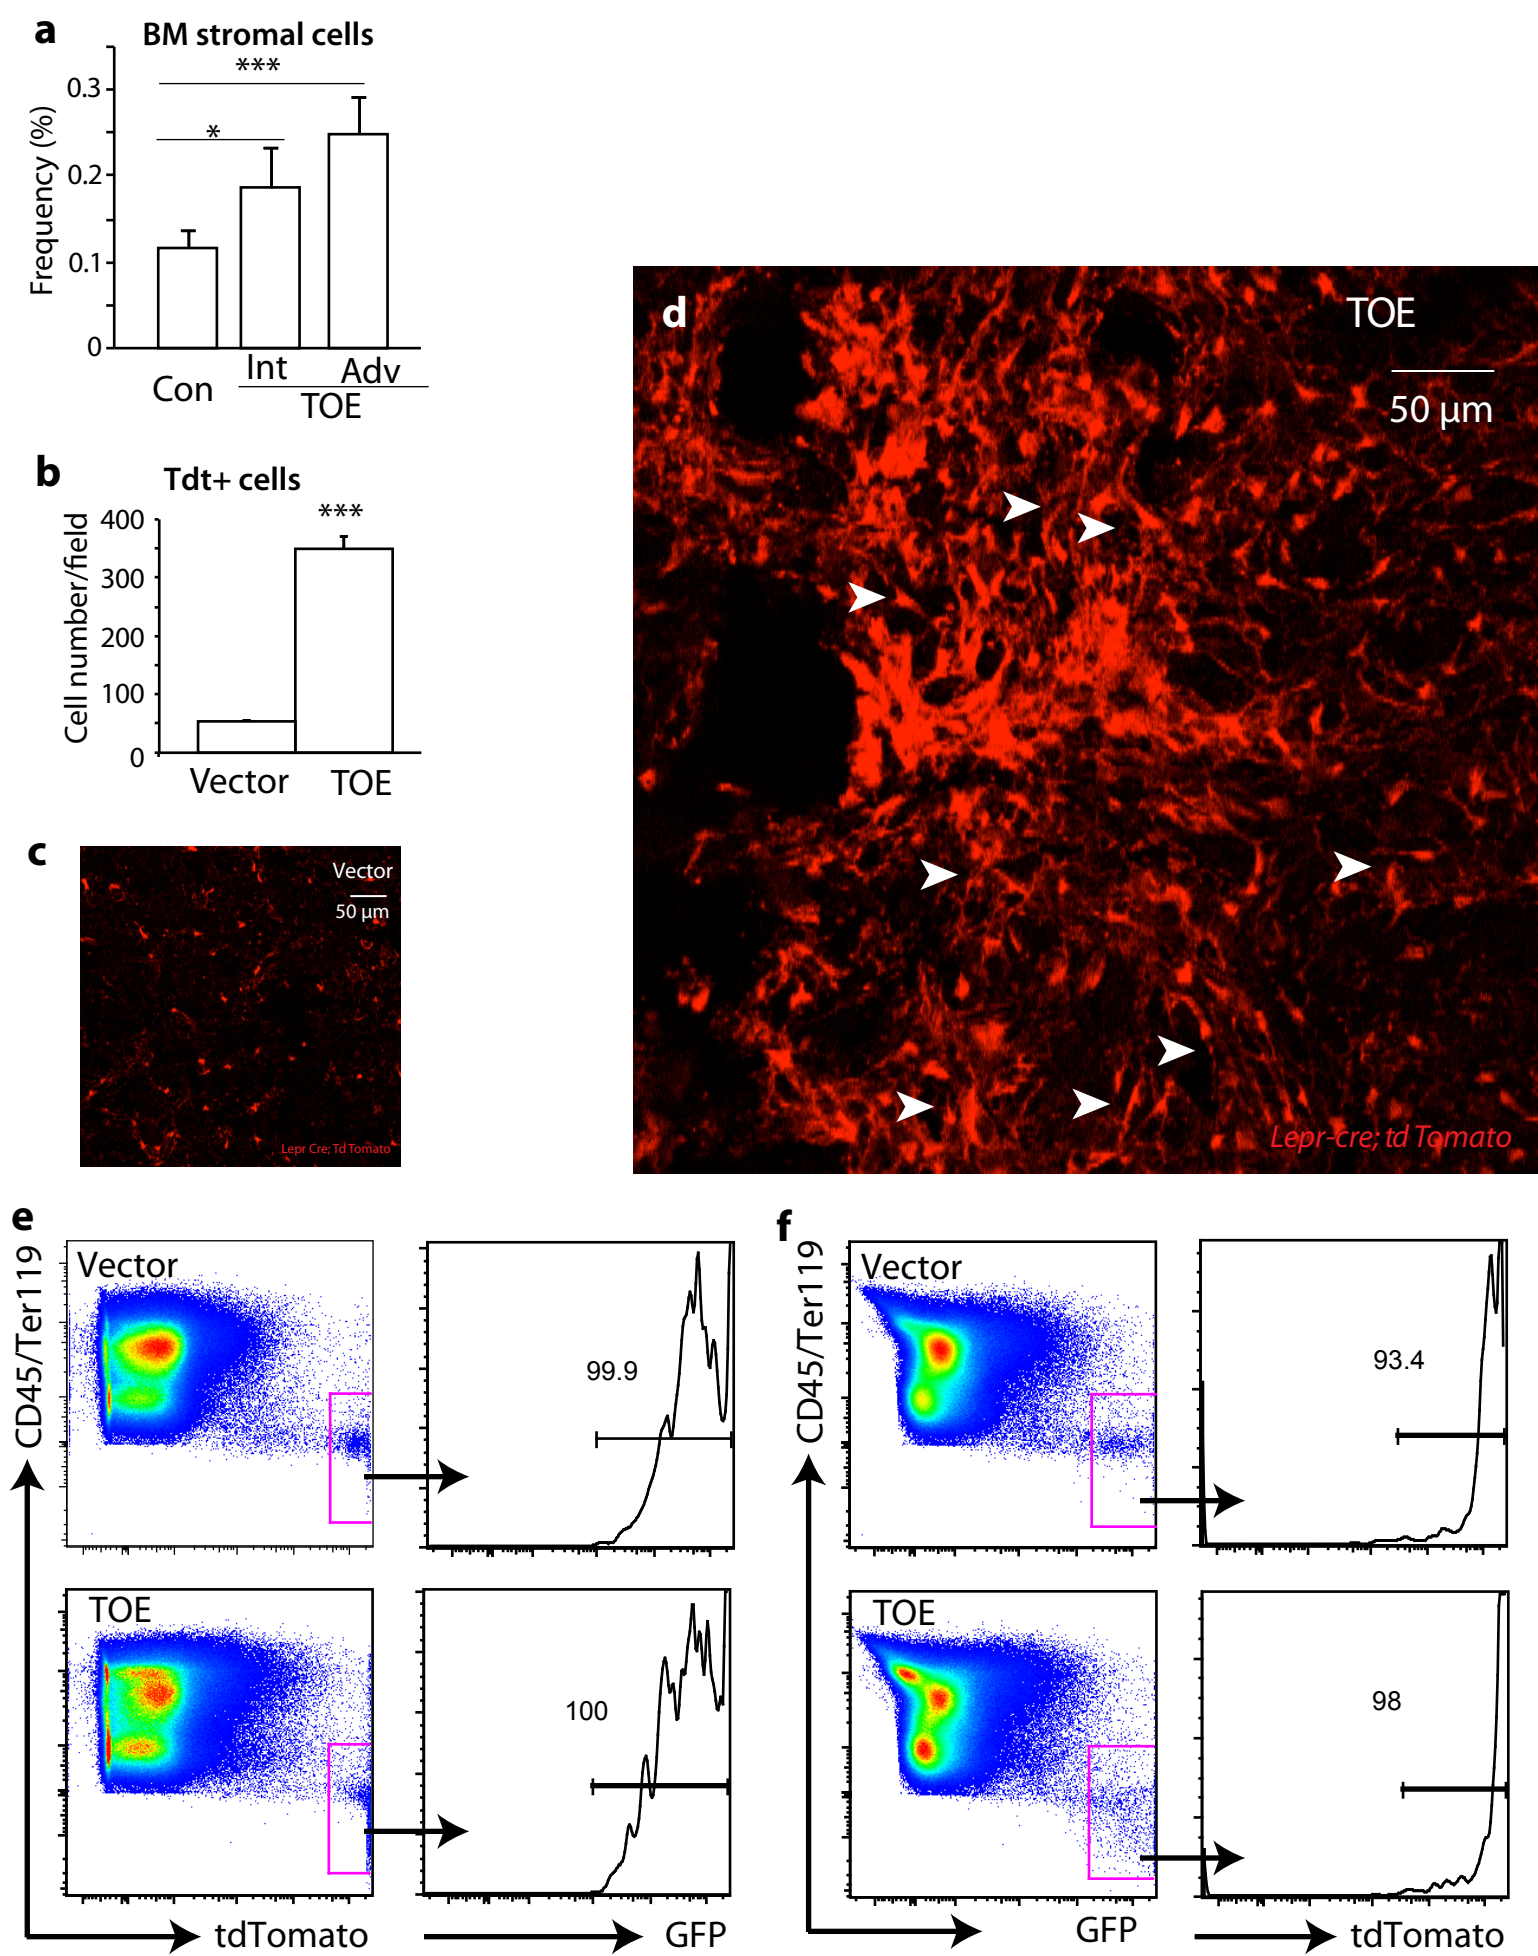

Figure S2

Supplement: NIHMS867394-supplement-3.pdf [file NIHMS867394-supplement-3.pdf]

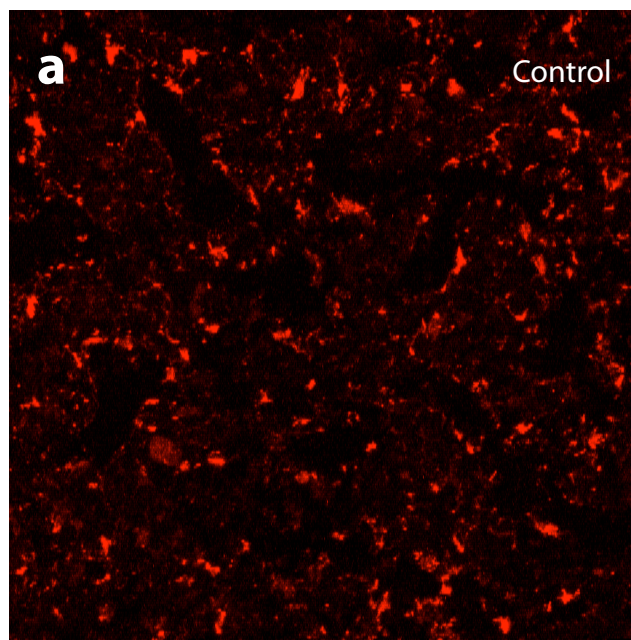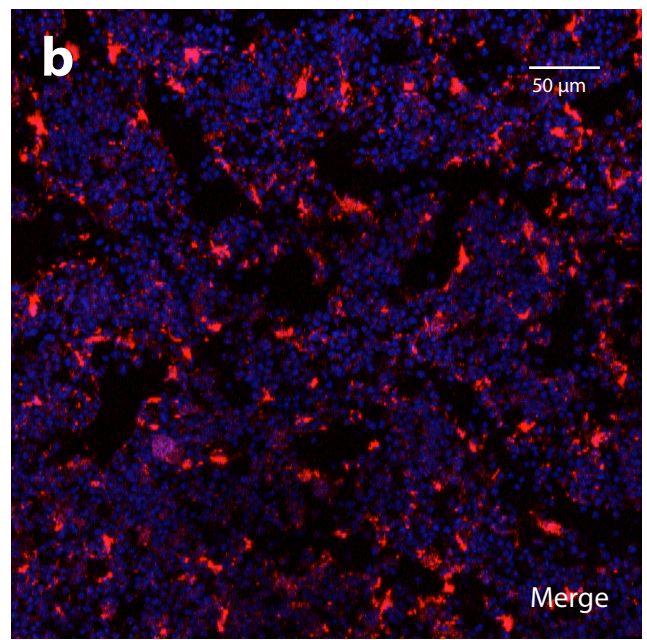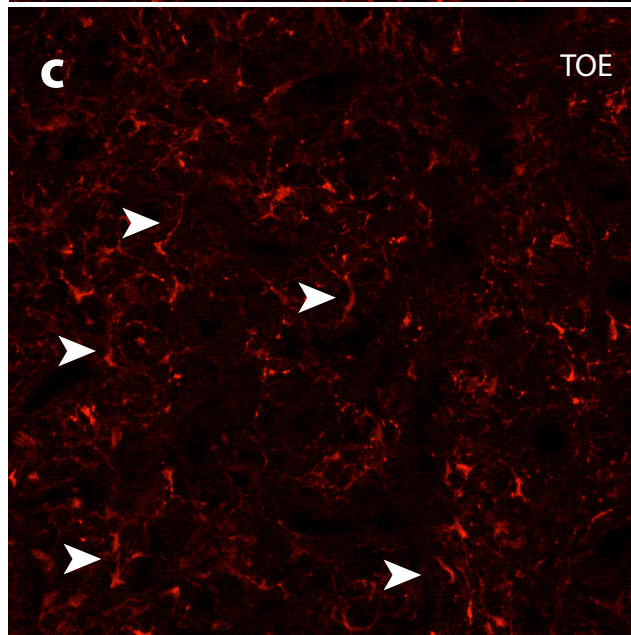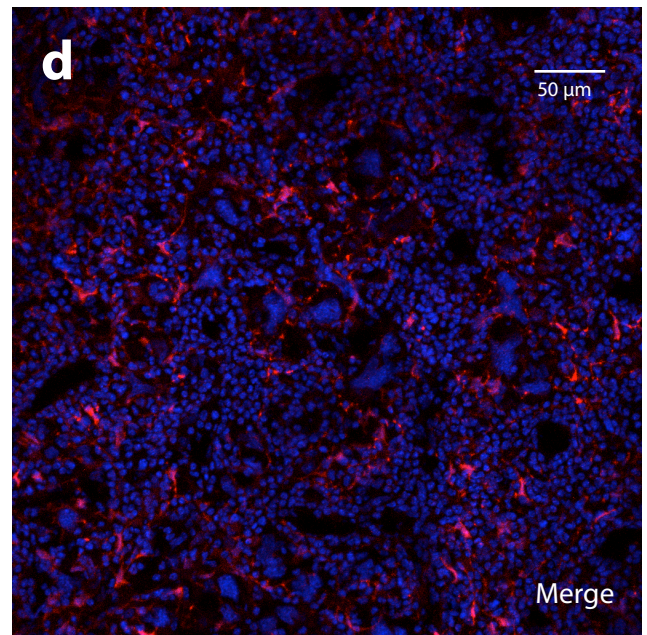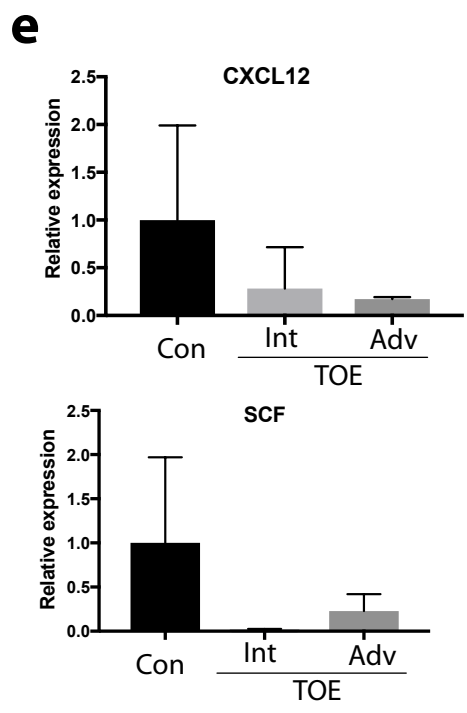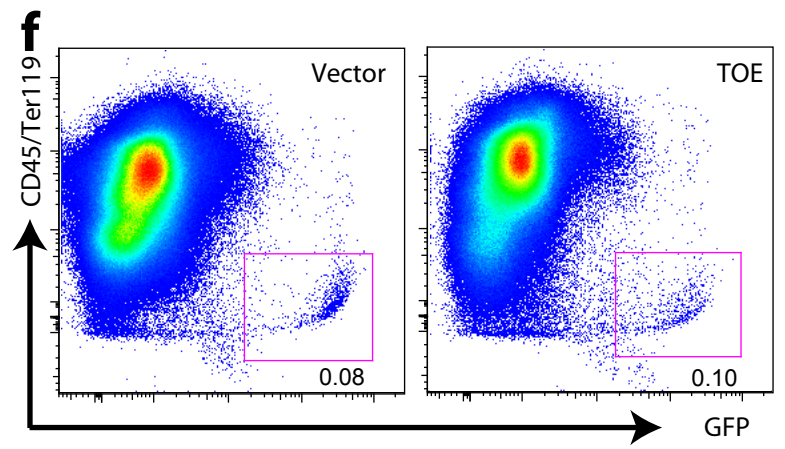

Figure S3

Supplement: NIHMS867394-supplement-4.pdf [file NIHMS867394-supplement-4.pdf]

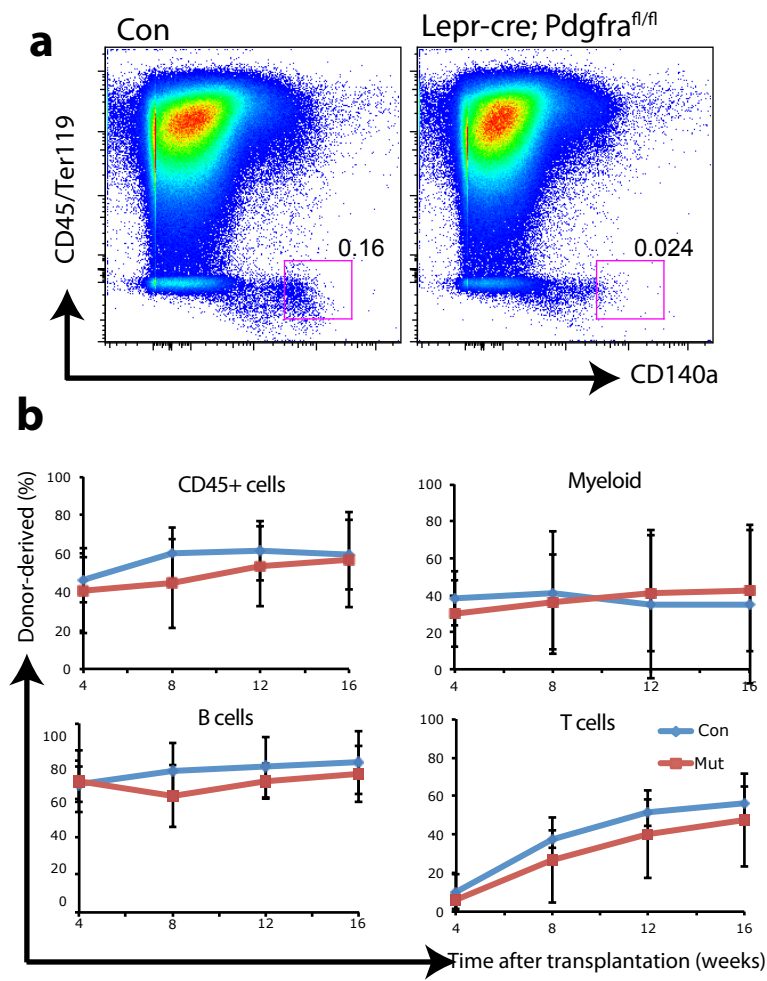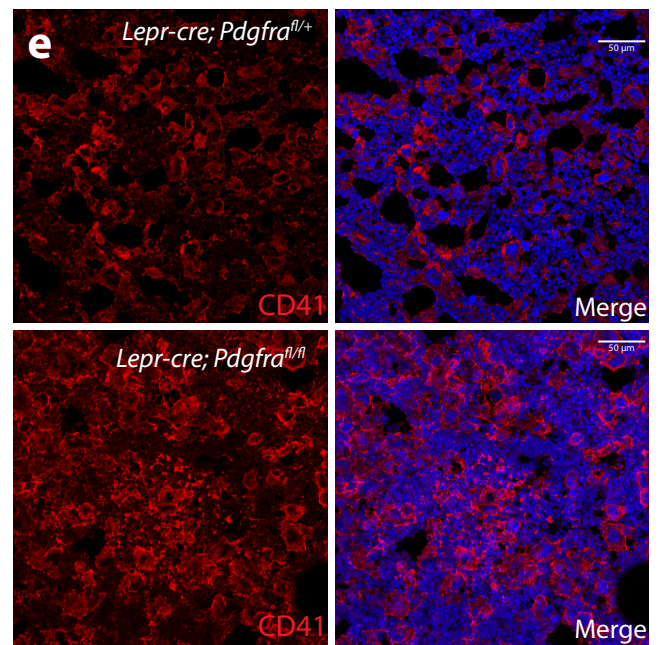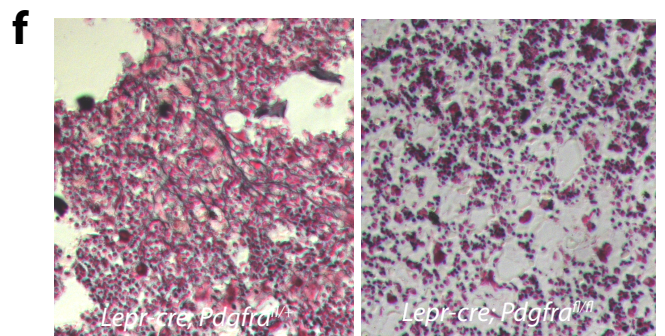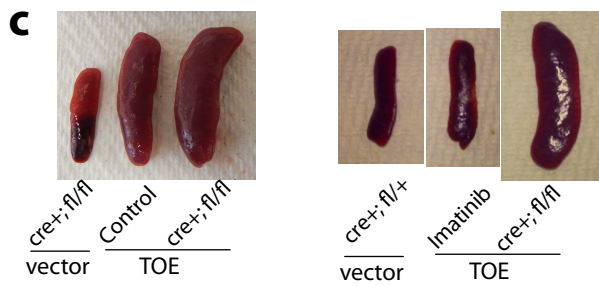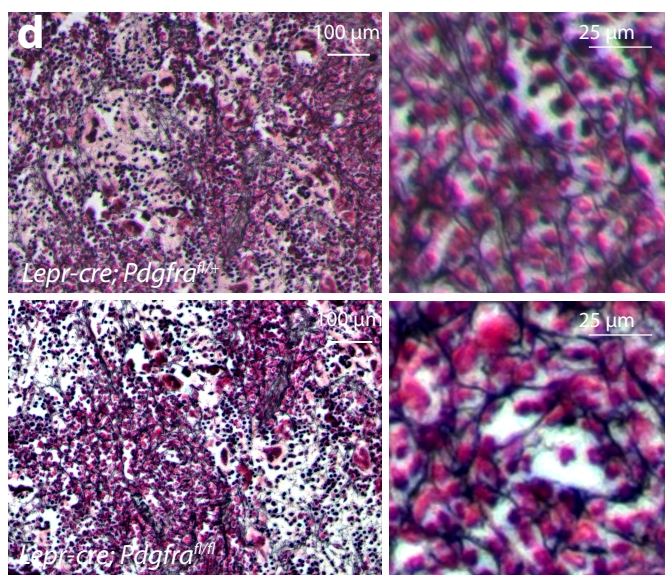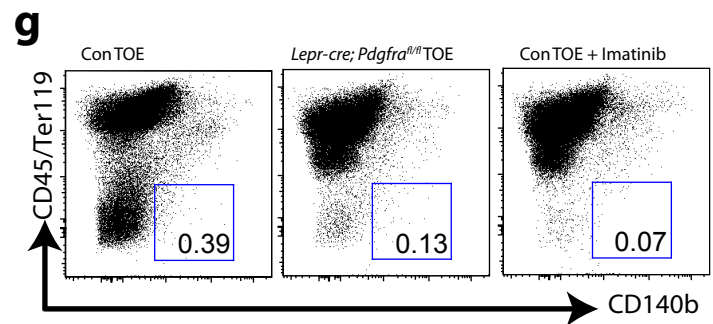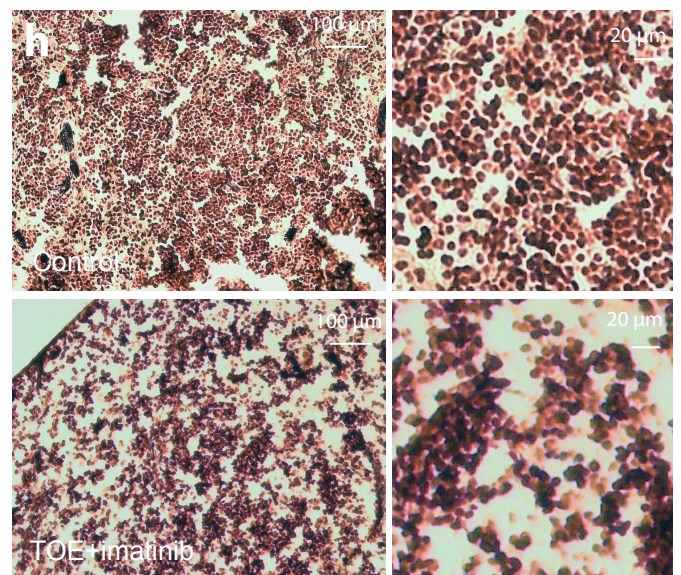

Figure S5

Supplement: NIHMS867394-supplement-6.pdf [file NIHMS867394-supplement-6.pdf]

**a**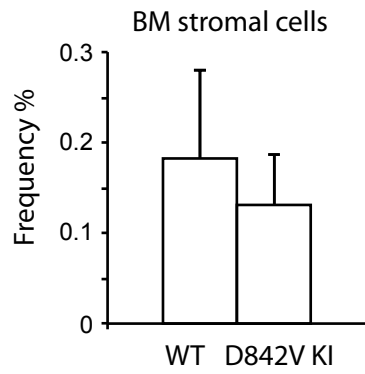**b**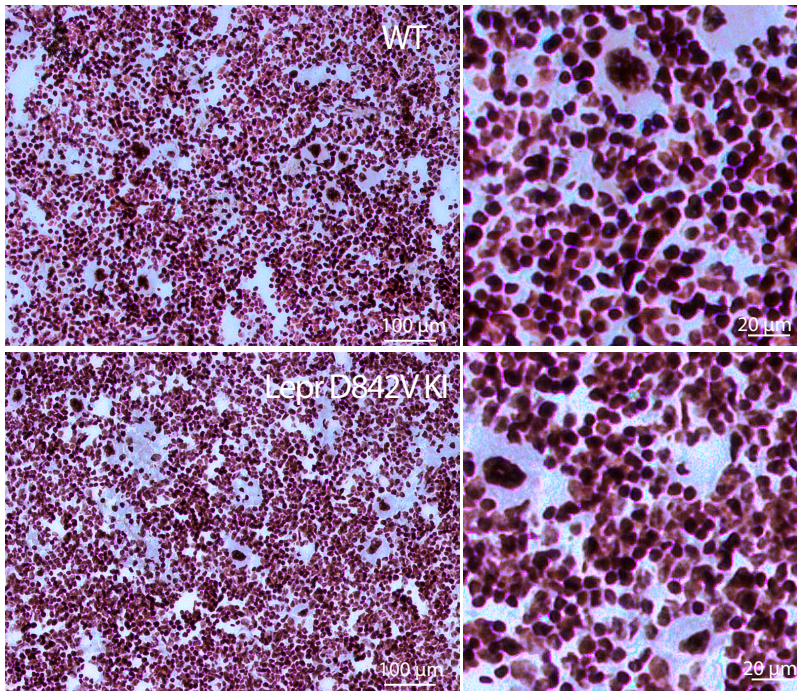**c**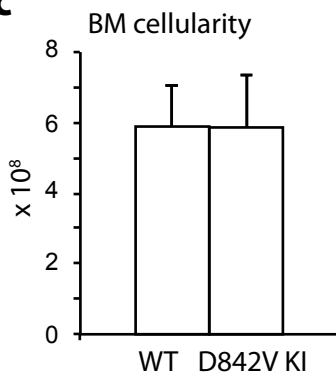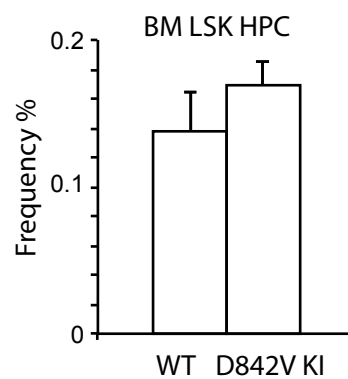**d**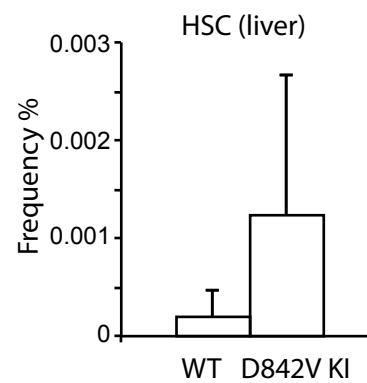

Figure S6

Supplement: NIHMS867394-supplement-7.pdf [file NIHMS867394-supplement-7.pdf]
